# Supplementary material for: Pharmacotherapy in Coronavirus Disease 2019 and Risk of Secondary Infections: A Single-Center Case Series and Narrative Review
Source: PubMed Central journal article supplement — Crit Care Explor. 2021 Jul 13;3(7):e0492. doi: 10.1097/CCE.0000000000000492 (PMC8280010; doi:10.1097/cce.0000000000000492), 2021-07-13
Supplement: cc9-3-e0492-s001.pdf [file cc9-3-e0492-s001.pdf]

**Supplementary Table 1. Secondary Infections by Source and Species**

| <b>Infectious Source</b> | <b>Gram Positive</b> | <b>Gram Negative</b> | <b>Fungal</b> | <b>Total</b> |
|--------------------------|----------------------|----------------------|---------------|--------------|
| Respiratory              | 41                   | 43                   | 5             | 71           |
| Bloodstream              | 36                   | 5                    | 5             | 41           |
| Urinary                  | -                    | -                    | 4             | 18           |
| Other                    | 6                    | 2                    | 7             | 15           |
| HSV Reactivation         |                      |                      |               | 17           |
| Total                    | 83                   | 50                   | 21            | 162          |

**Other Sources include pleural, fungal based on beta-D-glucan, skin and soft tissue, and intra-abdominal**
