# Supplementary material for: Pharmacotherapy in Coronavirus Disease 2019 and Risk of Secondary Infections: A Single-Center Case Series and Narrative Review
Source: PubMed Central journal article supplement — Crit Care Explor. 2021 Jul 13;3(7):e0492. doi: 10.1097/CCE.0000000000000492 (PMC8280010; doi:10.1097/cce.0000000000000492), 2021-07-13
Supplement: cc9-3-e0492-s002.pdf [file cc9-3-e0492-s002.pdf]

**Supplemental Table 2: Secondary Infections by Therapeutic Intervention**

| <b>Infectious Source</b> | <b>Tocilizumab</b> | <b>Corticosteroids</b> |
|--------------------------|--------------------|------------------------|
| Respiratory              | 6 (46.1)           | 68 (33.0)              |
| Bloodstream              | 3 (23.1)           | 41 (19.9)              |
| Urinary                  | 2 (15.4)           | 18 (8.7)               |
| Other                    | 0                  | 62 (30.1)              |
| HSV Reactivation         | 2 (15.4)           | 17 (8.3)               |
| Total                    | 13*                | 206^                   |

\*13 infections found in 11 patients with a secondary infection

^206 infections found in 106 patients with a secondary infection
