# Supplementary material for: Pharmacotherapy in Coronavirus Disease 2019 and Risk of Secondary Infections: A Single-Center Case Series and Narrative Review
Source: PubMed Central journal article supplement — Crit Care Explor. 2021 Jul 13;3(7):e0492. doi: 10.1097/CCE.0000000000000492 (PMC8280010; doi:10.1097/cce.0000000000000492), 2021-07-13
Supplement: cc9-3-e0492-s003.pdf [file cc9-3-e0492-s003.pdf]

**Supplementary Table 3: Studies Reporting Secondary Infections in COVID-19 Patients Treated with Tocilizumab**

| Author/<br>Year                         | Study Design/<br>Population                                                                         | Intervention                                                                                                        | Secondary Infections                                                                                  | Follow-up Duration | Secondary Infection Definition    | Comments                                                                                                           |
|-----------------------------------------|-----------------------------------------------------------------------------------------------------|---------------------------------------------------------------------------------------------------------------------|-------------------------------------------------------------------------------------------------------|--------------------|-----------------------------------|--------------------------------------------------------------------------------------------------------------------|
| Alattar et al.<br>2020 <sup>69</sup>    | Retrospective case series<br><br>25 ICU patients                                                    | TCZ IV<br><b>Dose:</b> Median 5.7mg/kg (IQR 4.8-9.5)<br><b>Duration:</b> Median 1 dose (IQR 1-3)                    | 4/25 (16%) developed bacterial PNA                                                                    | 14 days            | Not reported                      | Short follow-up duration                                                                                           |
| Campochiaro et al<br>2020 <sup>70</sup> | Retrospective case-control study<br><br>65 hospitalized patients<br>32 (49%) received TCZ           | TCZ IV<br><b>Dose:</b> 400mg/dose<br><b>Duration:</b> 1 or 2 doses                                                  | 4/32 (12.5%) developed BSI<br><br>1 patient developed candidemia and invasive pulmonary aspergillosis | 28 days            | No reported                       | BSI developed anywhere from 8-13 days after treatment                                                              |
| Vu et al<br>2020 <sup>71</sup>          | Retrospective case series<br><br>60 hospitalized patients,<br>75% admitted to ICU                   | TCZ IV<br><b>Dose:</b> 400mg (n=47), 600mg (n=13)<br><b>Duration:</b> 1 dose (n=57), 2 doses (n=3)                  | 16/60 (26.7%) developed secondary infections<br><br>48.3% BSI<br>48.3% PNA                            | 30 days            | Not reported                      | 10/16 (62.5%) received concomitant corticosteroids<br><br>Median time to infection was 10.5 days (range 2-28 days) |
| Guaraldi et al<br>2020 <sup>72</sup>    | Retrospective cohort study<br><br>544 hospitalized patients<br>179 (32.9%) received TCZ             | TCZ IV or SQ vs. SOC<br><b>Dose:</b> 8mg/kg IV (max 800mg/dose), 324mg SQ<br><b>Duration:</b> 2 doses IV, 1 dose SQ | New infection:<br>13% vs. 4% (p<0.0001)                                                               | Not reported       | Not reported                      | Infections included BSI, PNA, HBV and HSV-1 reactivation                                                           |
| Toniati et al<br>2020 <sup>74</sup>     | Single-center, prospective case series<br><br>100 hospitalized patients,<br>43% admitted to ICU     | TCZ IV<br><b>Dose:</b> 8mg/kg (max 800mg/dose)<br><b>Duration:</b> 2 doses, optional 3 <sup>rd</sup> dose           | 2 cases of septic shock resulting in mortality                                                        | 10 days            | Not reported                      | Non-severe secondary infections not reported<br><br>Short follow-up duration                                       |
| Biran et al.<br>2020 <sup>73</sup>      | Multi-center retrospective cohort study<br><br>764 ICU patients<br>210 (27%) received TCZ           | TCZ IV vs. SOC<br><b>Dose:</b> 400mg/dose<br><b>Duration:</b> 1 dose, optional 2 <sup>nd</sup> dose                 | 17% vs. 13%<br><br>BSI: 9% vs. 8%<br><br>PNA: 12% vs. 7%                                              | Median of 22 days  | Positive blood or sputum cultures | Overall rate of infection was low for critically ill cohort                                                        |
| Rossotti et al<br>2020 <sup>87</sup>    | Single-center, retrospective cohort study<br><br>222 hospitalized patients<br>74 (33%) received TCZ | TCZ IV vs. SOC<br><b>Dose:</b> 8mg/kg (max 800mg/dose)<br><b>Duration:</b> 1 dose, optional 2 <sup>nd</sup> dose    | 32.4% developed infection<br><br>78% of infections occurred in critically ill patients                | Not reported       | Not reported                      | No statistical comparison to standard of care group for infection                                                  |

|                                    |                                                                                                                                          |                                                                                                                      |                                                                                                                                       |                    |                                                                                                                                                                                |                                                                                                                |
|------------------------------------|------------------------------------------------------------------------------------------------------------------------------------------|----------------------------------------------------------------------------------------------------------------------|---------------------------------------------------------------------------------------------------------------------------------------|--------------------|--------------------------------------------------------------------------------------------------------------------------------------------------------------------------------|----------------------------------------------------------------------------------------------------------------|
| Somers et al 2020 <sup>76</sup>    | Retrospective, single-center cohort study<br><br>154 mechanically ventilated patients<br>78 (51%) received TCZ                           | TCZ IV vs. SOC<br><b>Dose:</b> 8mg/kg (max 800mg/dose)<br><b>Duration:</b> 1 dose, optional 2 <sup>nd</sup> dose     | 54% vs. 26%; p<0.001<br><br>VAP: 45% vs. 20%; p<0.001<br><br>BSI: 14% vs. 9%; p=0.34                                                  | Median of 47 days  | Positive respiratory and blood culture >48h after hospitalization assessed by infectious disease physician                                                                     | Overall, only 25% of patients received corticosteroids<br><br><i>Staph aureus</i> was most common cause of VAP |
| Giacobbe et al 2020 <sup>41</sup>  | Retrospective, single-center cohort study<br><br>78 ICU patients<br>18 (23%) received TCZ                                                | TCZ IV<br><b>Dose:</b> 8mg/kg (max 800mg/dose)<br><b>Duration:</b> 1 dose, optional 2 <sup>nd</sup> dose             | 40% developed BSI<br><br>TCZ alone:<br>HR 1.07 (0.38-3.04)<br><br>TCZ + steroids:<br>HR 10.7 (2.71-42.17)                             | Discharge or death | BSI defined as at least one positive blood culture >48h after ICU admission<br><br>Coagulase-negative staphylococci required two consecutive blood cultures with same organism | Methylprednisolone was administered at 1mg/kg<br><br>Follow-up past 12 days available for <33% of patients     |
| Lewis et al 2020 <sup>77</sup>     | Multi-center, retrospective, cohort study<br><br>3580 hospitalized patients<br>497 (13.9%) received TCZ                                  | TCZ IV vs. SOC<br><b>Dose:</b> 400mg<br><b>Duration:</b> 1 dose                                                      | 34.4% vs. 10.7%, OR 4.18 (2.72-6.52)<br><br>BSI: 13.9% vs. 3.6%; OR 3.85 (2.08-7.46)<br><br>PNA: 25.9% vs. 5.8%; OR 5.96 (3.47-10.66) | Not reported       | Not reported                                                                                                                                                                   | Median time to infection was 10 days in TCZ group                                                              |
| Hermine et al 2020 <sup>78</sup>   | Multi-center, open-label, randomized trial<br><br>CORIMUNO-19<br>131 non-intubated patients<br>64 (49%) received TCZ                     | TCZ IV vs. SOC<br><b>Dose:</b> 8mg/kg (max 800mg/dose)<br><b>Duration:</b> 1 dose, optional 2 <sup>nd</sup> dose     | 3.1% vs. 19.4%                                                                                                                        | 28 days            | Not reported                                                                                                                                                                   | Bacterial sepsis and fungal sepsis were only reported                                                          |
| Salvarani et al 2020 <sup>79</sup> | Multi-center, open-label, randomized trial<br><br>RCT-TCZ-COVID-19<br>126 non-intubated patients<br>60 (48%) received TCZ                | TCZ IV vs. SOC<br><b>Dose:</b> 8mg/kg (max 800mg/dose)<br><b>Duration:</b> 2 doses                                   | 1.7% vs. 6.3%                                                                                                                         | 14 days            | Not reported                                                                                                                                                                   | Short follow-up duration                                                                                       |
| Stone et al 2020 <sup>60</sup>     | Multi-center, randomized, double-blind, placebo-controlled trial<br><br>BACC Bay<br>243 non-intubated patients<br>161 (66%) received TCZ | TCZ IV vs. placebo<br><b>Dose:</b> 8mg/kg (max 800mg/dose)<br><b>Duration:</b> 1 dose                                | 8.1% vs. 17.1%; p=0.03                                                                                                                | 28 days            | Not reported                                                                                                                                                                   | Non-severe secondary infections not reported<br><br>13.7% vs. 1.2% developed severe neutropenia                |
| Gordon et al 2021 <sup>80</sup>    | Multi-center, randomized, double-blind, placebo-controlled trial<br><br>REMAP-CAP<br>755 ICU patients                                    | TCZ IV vs. placebo<br><b>Dose:</b> 8mg/kg (max 800mg/dose)<br><b>Duration:</b> 1 dose, optional 2 <sup>nd</sup> dose | 1 serious secondary bacterial infection in TCZ group                                                                                  | 21 days            | Not reported                                                                                                                                                                   | Non-severe secondary infections not reported                                                                   |

|                                                   |                                                                                                                                      |                                                                                                                            |                                                                   |         |              |                                            |
|---------------------------------------------------|--------------------------------------------------------------------------------------------------------------------------------------|----------------------------------------------------------------------------------------------------------------------------|-------------------------------------------------------------------|---------|--------------|--------------------------------------------|
|                                                   | 353 (47%) received TCZ                                                                                                               |                                                                                                                            |                                                                   |         |              |                                            |
| Salama et al<br>2021 <sup>61</sup><br><br>EMPACTA | Multi-center, randomized,<br>double-blind, placebo-<br>controlled trial<br><br>377 non-intubated patients<br>249 (66%) received TCZ  | TCZ IV vs. placebo<br><b>Dose:</b> 8mg/kg (max<br>800mg/dose)<br><b>Duration:</b> 1 dose,<br>optional 2 <sup>nd</sup> dose | 12.6% vs. 10%                                                     | 60 days | Not reported | Types of infections were<br>not classified |
| Rosas et al<br>2021 <sup>3</sup>                  | Multi-center, randomized,<br>double-blind, placebo-<br>controlled trial<br><br>438 hospitalized patients<br>294 (67.1%) received TCZ | TCZ IV vs. placebo<br><b>Dose:</b> 8mg/kg (max<br>800mg/dose)<br><b>Duration:</b> 1 dose,<br>optional 2 <sup>nd</sup> dose | 21% vs. 25.6%<br><br>PNA: 2.4% vs. 2.8%<br><br>BSI: 0.7% vs. 2.1% | 28 days | Not reported |                                            |

TCZ=tocilizumab, SOC=standard of care, BSI=bloodstream infection, PNA=pneumonia, VAP=ventilator-associated pneumonia, HBV=hepatitis B virus,  
HSV=herpes simplex virus
